# Supplementary material for: Giving or Taking: Children’s Development of Leadership Concepts in Group Contributions and Rewards
Source: Research Square preprint supplement (doi:10.21203/rs.3.rs-7984510/v1), 2025-11-13
Supplement: Supplementary file 1 [file c442642a8a9914055e910eac.docx]

# Supplementary Materials

## Data Analysis Packages Used in This Study

The ‘effectsize’ package1 was used to compute effect sizes, the ‘emmeans’ package2 was used for post hoc comparisons, and the ‘ggplot2’ package3 was used for data visualization, the ‘lme4’ package4 was used to fit linear mixed-effects models, the ‘lmerTest’ package5 and the ‘ggeffects’ package6 was used to extract statistical estimates, and the ‘reghelper’ package7 was used to perform simple slope analyses.

## Participant Demographics

TABLE S1. Information of participants in experiment 3

| Grade | Age (SD) | *N*Total | *N*Self-eader | *N*Other-Leader | *N*Self-Egalitarian | Female Ratio |
| --- | --- | --- | --- | --- | --- | --- |
| 1 | 6.95 (0.64) | 83 | 28 | 28 | 27 | 0.49 |
| 2 | 7.98 (0.35) | 83 | 27 | 28 | 28 | 0.52 |
| 3 | 9.49 (0.64) | 89 | 31 | 32 | 26 | 0.39 |
| 4 | 10.30 (0.71) | 70 | 26 | 21 | 23 | 0.59 |
| 5 | 11.37 (0.80) | 67 | 22 | 23 | 22 | 0.49 |
| All | 9.10 (1.68) | 392 | 134 | 132 | 126 | 0.49 |

TABLE S2. Demographic information of participants in experiment 4

| Grade | Age (SD) | *N*Total | *N*Leader | *N*Control | Female Ratio |
| --- | --- | --- | --- | --- | --- |
| 1 | 7.18（0.53） | 77 | 36 | 41 | 0.47 |
| 2 | 8.50（0.76） | 97 | 50 | 47 | 0.49 |
| 3 | 9.53（0.68） | 89 | 47 | 42 | 0.39 |
| 4 | 10.37（0.75） | 73 | 38 | 35 | 0.60 |
| 5 | 11.30（0.65） | 65 | 32 | 33 | 0.49 |
| All | 9.27（1.53） | 401 | 203 | 198 | 0.49 |

## Supplementary Data Analysis

Although the linear model indicated a declining trend, it did not clarify the endpoint of this decrease. Therefore, we conducted additional analyses on the fifth-grade data, as shown in Table 2. When equal contributions were possible, children believed that leaders and non-leaders should contribute equally (*ps* > .05). They also believed that leaders should cover the extra cost when four members were required to contribute five coins, but they did not believe leaders should contribute nothing when only three coins were required. Notably, the self-other differences observed in lower grades disappeared: whether children assumed the leader role themselves or observed others as leaders, their understanding of leadership was consistent.

**TABLE S3. Descriptive Statistics and One-Sample t-Test Results for Fifth-Grade Data**

| Condition | Amount | *M* | SD | *t* | *p* | *d* |
| --- | --- | --- | --- | --- | --- | --- |
| Self-Leader | Pay 4 | 1 | 0 | NA | NA | NA |
| *N* = 22 | Pay 3 | 0.91 | 0.61 | -0.70 | .492 | -0.15 |
|  | Pay 5 | 1.95 | 0.21 | 21.00 | <.001 | 4.48 |
| Other-Leader | Pay 4 | 1.13 | 0.34 | 1.82 | .083 | 0.38 |
| *N* = 23 | Pay 3 | 0.83 | 0.65 | -1.28 | .213 | -0.27 |
|  | Pay 5 | 1.91 | 0.79 | 5.52 | <.001 | 1.15 |
| Self-Egalitarian | Pay 4 | 1.23 | 0.92 | 1.16 | .261 | 0.25 |
| *N* = 22 | Pay 3 | 1 | 0.93 | 0.00 | 1.00 | 0.00 |
|  | Pay 5 | 1.64 | 0.66 | 4.54 | <.001 | 0.97 |

*Note*. The test value for the one-sample t-tests was set at 1. Due to the emergence of specific strategies—for example, choosing to contribute two coins when the group was required to contribute five—we presented the data using the actual number of coins contributed rather than proportional scores. This approach provides a clearer representation of children’s original contribution strategies.

**TABLE S4. Fixed Effects of the Linear Mixed Models and Linear Regression Model**

| Model | Predictors | Estimated | SE | df | t | p | 95% CI |
| --- | --- | --- | --- | --- | --- | --- | --- |
| Pay | Intercept (Self as Leader) | 0.79 | 0.05 | 386.00 | 14.87 | <.001 | [0.68, 0.89] |
|  | Condition1 | -0.47 | 0.08 | 386.00 | -6.32 | <.001 | [-0.62, -0.33] |
|  | Condition 2 | -0.29 | 0.08 | 386.00 | -3.82 | <.001 | [-0.44, -0.14] |
|  | Grade (Self as Leader) | -0.10 | 0.02 | 386.00 | -6.38 | <.001 | [-0.14, -0.07] |
|  | Grade (Other as Leader) | -0.01 | 0.02 | 386.00 | -0.58 | .565 | [-0.04, 0.02] |
|  | Grade (Self as Egalitarian) | -0.04 | 0.02 | 386.00 | -2.15 | .032 | [-0.07, -0.00] |
|  | Condition 1 * Grade | 0.10 | 0.02 | 386.00 | 4.10 | <.001 | [0.05, 0.14] |
|  | Condition 2 * Grade | 0.07 | 0.02 | 386.00 | 2.95 | <.001 | [0.02, 0.12] |
| Gain | Intercept (Self as Leader) | 0.13 | 0.03 | 768.06 | 4.66 | <.001 | [0.08, 0.19] |
|  | Condition 1 | 0.09 | 0.04 | 768.06 | 2.30 | .022 | [0.01, 0.17] |
|  | Condition 2 | 0.02 | 0.04 | 768.06 | 0.54 | .591 | [-0.06, 0.10] |
|  | Grade (Self as Leader, Gain 3) | -0.01 | 0.01 | 768.06 | -0.84 | .403 | [-0.02, 0.01] |
|  | Grade (Other as Leader, Gain 3) | 0.01 | 0.01 | 768.06 | 1.21 | .227 | [-0.01, 0.03] |
|  | Grade (Self as Egalitarian, Gain 3) | -0.01 | 0.01 | 768.06 | -1.09 | .274 | [-0.03, 0.01] |
|  | Grade (Self as Leader, Gain 5) | -0.00 | 0.01 | 768.06 | -0.51 | .608 | [-0.02, 0.01] |
|  | Grade (Other as Leader, Gain 5) | -0.02 | 0.01 | 768.06 | -2.82 | .005 | [-0.04, -0.01] |
|  | Grade (Self as Egalitarian, Gain 5) | 0.01 | 0.01 | 768.06 | 1.41 | .160 | [-0.00, 0.03] |
|  | Amount | 0.16 | 0.04 | 386.00 | 4.10 | <.001 | [0.08, 0.24] |
|  | Condition 1 * Grade | 0.02 | 0.01 | 768.06 | 1.45 | .149 | [-0.01, 0.04] |
|  | Condition 2 * Grade | -0.00 | 0.01 | 768.06 | -0.19 | .848 | [-0.03, 0.02] |
|  | Amount * Grade | 0.00 | 0.01 | 386.00 | 0.24 | .813 | [-0.02, 0.03] |
|  | Condition 1 * Amount | 0.02 | 0.06 | 386.00 | 0.34 | .730 | [-0.09, 0.13] |
|  | Condition 2 * Amount | -0.08 | 0.06 | 386.00 | -1.40 | .162 | [-0.19, 0.03] |
|  | Condition 1 * Grade * Amount | -0.04 | 0.02 | 386.00 | -2.26 | .024 | [-0.07, -0.00] |
|  | Condition 2 * Grade * Amount | 0.02 | 0.02 | 386.00 | 1.14 | .255 | [-0.01, 0.05] |
| P-G | Intercept (Self as Leader) | 6.52 | 0.68 | 386.00 | 9.56 | <.001 | [5.18, 7.87] |
|  | Condition 1 | -6.42 | 0.96 | 386.00 | -6.67 | <.001 | [-8.31, -4.53] |
|  | Condition 2 | -3.22 | 0.97 | 386.00 | -3.31 | .001 | [-5.12, -1.31] |
|  | Grade (Self as Leader) | -1.20 | 0.21 | 386.00 | -5.65 | <.001 | [-1.62, -0.78] |
|  | Grade (Other as Leader) | -0.02 | 0.21 | 386.00 | -0.10 | .922 | [-0.44, 0.40] |
|  | Grade (Self as Egalitarian) | -0.46 | 0.21 | 386.00 | -2.12 | .034 | [-0.88, -0.03] |
|  | Condition 1 * Grade | 1.18 | 0.30 | 386.00 | 3.92 | <.001 | [0.59, 1.77] |
|  | Condition 2 * Grade | 0.74 | 0.30 | 386.00 | 2.46 | .014 | [0.15, 1.34] |

*Note*. Condition 1: Self as Leader vs. Other as Leader; Condition 2: Self as Leader vs. Self as Egalitarian; Amount: Gain 5 vs. Gain 3; Model P-G: Contribution Amount - Gain Amount ~ Condition * Grade, residual SE: 3.38, Multiple R-squared: 0.19, Adjusted R-square: 0.18, *F*(5, 386) = 18.03, *p* < .001. This table also reports the results of the simple slopes test.

## Reference

1. Ben-Shachar, M., Lüdecke, D. & Makowski, D. effectsize: Estimation of Effect Size Indices and Standardized Parameters. J Open Source Softw 5, 2815 (2020).

2. Russell, V. emmeans: Estimated Marginal Means, aka Least-Squares Means. R package version 1.11.0 https://CRAN.R-project.org/package=emmeans (2025).

3. Hadley, W. Ggplot2: Elegant Graphics for Data Analysis. (Springer-Verlag New York, 2016).

4. Bates, D., Mächler, M., Bolker, B. & Walker, S. Fitting Linear Mixed-Effects Models Using lme4. J Stat Softw 67, (2015).

5. Kuznetsova, A., Brockhoff, P. B. & Christensen, R. H. B. lmerTest Package: Tests in Linear Mixed Effects Models. J Stat Softw 82, (2017).

6. Lüdecke, D. ggeffects: Tidy Data Frames of Marginal Effects from Regression Models. J Open Source Softw 3, 772 (2018).

7. Jeffrey, H. & David, B. reghelper: Helper Functions for Regression Analysis. R package version 1.1.2 https://CRAN.R-project.org/package=reghelper (2023).
